# Supplementary material for: Patterns of Reproductive Management in Sheep and Goat Farms in Greece
Source: MDPI journal article supplement (doi:10.3390/ani12243455), 2022-12-07
Supplement: s1 [file s1]

# Patters of Reproductive Management in Sheep and Goat Farms in Greece

Daphne T. Lianou, Natalia G.C. Vasileiou, Charalambia K. Michael, Irene Valasi, Vasia S. Mavrogianni, Mariangela Caroprese and George C. Fthenakis

**Table S1.** Details of variables ( $n = 48$ ) collected during interview of farmers by means of a structured questionnaire and used in the evaluations for potential associations with patterns of reproductive management in 325 sheep flocks and 199 goat herds during a countrywide investigation in Greece.

---

|                                                                                                                                                |
|------------------------------------------------------------------------------------------------------------------------------------------------|
| Management system applied in the farm (description according to EFSA classification <sup>1</sup> )                                             |
| Total grazing land by the farm animals (acres)                                                                                                 |
| Type of milking (hand-milking / machine-milking)                                                                                               |
| Daily number of milking sessions (no.)                                                                                                         |
| No. of female animals in the farm (no.)                                                                                                        |
| No. of male animals in the farm (no.)                                                                                                          |
| Breed of animals in the farm (description)                                                                                                     |
| Average age of culling female animals (years)                                                                                                  |
| Source of replacement animals (own animals / purchase)                                                                                         |
| Criteria for selection of own animals as replacements (description)                                                                            |
| Criteria for selection of animals for purchase as replacements (description)                                                                   |
| Total milk quantity per ewe / doe obtained during the preceding milking period (litres)                                                        |
| Total number of lambs / kids born during the preceding lambing season (no.)                                                                    |
| Collaboration with a veterinarian (yes / no)                                                                                                   |
| Beginning of the mating period for ewes / female goats (month)                                                                                 |
| End of the mating period for ewes / female goats (month)                                                                                       |
| Beginning of the mating period for ewe-lambs and replacement female goats (month)                                                              |
| End of the mating period for ewe-lambs and doelings (month)                                                                                    |
| Reproductive management (no hormonal control / administration of melatonin / administration of progestogens / application of other techniques) |
| Use of teaser male animals (yes / no)                                                                                                          |
| Use of artificial insemination (yes / no)                                                                                                      |
| Use of embryo transfer (yes / no)                                                                                                              |
| Use of ultrasound for pregnancy diagnosis (yes / no)                                                                                           |
| Nutritional modifications before the lambing period (yes / no)                                                                                 |
| Grouping of pregnant females during the final stage of pregnancy (yes / no)                                                                    |
| Induction of lambing (yes / no)                                                                                                                |
| Availability of a separate lambing / kidding area (yes / no)                                                                                   |
| Newborn care and specific monitoring (yes / no)                                                                                                |
| Maintenance of a colostrum bank (yes / no)                                                                                                     |
| Newborn fostering to female animals other than their dams (yes / no)                                                                           |

Disinfection of the navel stump in newborns (yes / no)  
 Tail docking in newborns (yes / no)  
 Administration of milk replacer to lambs (yes / no)  
 Vaccination against clostridial infections (yes / no)  
 Vaccination regime applied (description)  
 Vaccination against contagious agalactia (yes / no)  
 Vaccination regime applied (description)  
 Vaccination against pneumonia (yes / no)  
 Vaccination regime applied (description)  
 Vaccination against staphylococcal mastitis (yes / no)  
 Vaccination regime applied (description)  
 Age of farmer (years)  
 Length of previous animal farming experience (years)  
 Farmer's general education (description: primary = European Qualifications Framework Levels 1 or 2, secondary = or post-secondary = European Qualifications Framework Levels 3, 4 or 5, tertiary = European Qualifications Framework Level 6, 7 or 8)  
 Farmer's professional involvement in farming (full-time / part-time)  
 Daily period spent by farmer at the farm (hours)  
 Family tradition in farming (yes / no)  
 Presence of working staff in the farm (yes/no)

---

<sup>1</sup> management system classified as intensive, semi-intensive, semi-extensive, extensive (European Food Safety Authority. Scientific opinion on the welfare risks related to the farming of sheep for wool, meat and milk production. *EFSA J.* **2014**, *12*, 3933–4060.).

**Table S2.** Details of multivariable models ( $n = 6$ ) employed for the evaluation for reproductive management procedures in 325 sheep flocks and 119 goat herds in Greece.

| Outcome                                                              | Variables ( $n$ )                     |                                          |                                                                                                                                                                                                           |
|----------------------------------------------------------------------|---------------------------------------|------------------------------------------|-----------------------------------------------------------------------------------------------------------------------------------------------------------------------------------------------------------|
|                                                                      | assessed in uni-<br>variable analyses | offered to the multi-<br>variable models | required in the final models                                                                                                                                                                              |
| Application of reproductive control - sheep                          | 16                                    | 10                                       | (a) Availability of milking parlour, (b) No. of ewes in the flock, (c) Number of daily milking sessions, (d) Age of farmer, (e) Daily period spent by farmer at the farm, (f) Family tradition in farming |
| Application of reproductive control - goats                          | 16                                    | 5                                        | (a) Availability of milking parlour, (b) Number of daily milking sessions, (c) Daily period spent by farmer at the farm                                                                                   |
| Pregnancy diagnosis by means of ultrasonographic examination - sheep | 11                                    | 9                                        | (a) Management system applied in farm, (b) Availability of milking parlour, (c) Age of farmer, (d) Length of previous animal farming experience of the farmer, (e) Family tradition in farming            |
| Pregnancy diagnosis by means of ultrasonographic examination - goats | 11                                    | 8                                        | (a) Management system applied in farm, (b) Availability of milking parlour                                                                                                                                |
| High number of lambs born per ewe                                    | 16                                    | 6                                        | (a) Location of the farm, (b) Breed of animals, (c) Collaboration with a veterinarian, (d) Application of reproductive control, (e) Presence of working staff in the flock                                |
| High number of kids born per female goat                             | 16                                    | 7                                        | (a) Breed of animals, (b) Application of reproductive control                                                                                                                                             |

**Table S3.** Month (median (range)) of start of mating season in sheep and goat farms in Greece, in accord with the management system in the farms or the location of the farms in the country.

| Management system                            | Sheep            |                    | Goats            |                       |
|----------------------------------------------|------------------|--------------------|------------------|-----------------------|
|                                              | Adult ewes       | Ewe-lambs          | Adult does       | Doelings              |
| Intensive or semi-intensive                  | May (Feb.-Oct.)  | August (Jan.-Dec.) | June (Mar.-Oct.) | August (Jan.-Dec.)    |
| Semi-extensive or extensive                  | May (Feb.-Dec.)  | August (May.-Dec.) | June (Jan.-Dec.) | August (Jan.-Dec.)    |
| <i>p</i>                                     | 0.88             | 0.09               | 0.68             | 0.92                  |
| Area of the country, where farms are located | Sheep            |                    | Goats            |                       |
|                                              | Adult ewes       | Ewe-lambs          | Adult does       | Doelings              |
| Northern part                                | June (Mar.-Sep.) | August (Jan.-Dec.) | July (Mar.-Sep.) | September (Jan.-Dec.) |
| Central part                                 | May (Feb.-Oct.)  | August (Jan.-Dec.) | May (Feb.-Dec.)  | August (Jan.-Dec.)    |
| Southern part                                | May (Apr.-Dec.)  | August (May.-Dec.) | May (Jan.-Jul.)  | July (Jan.-Nov.)      |
| <i>p</i>                                     | < 0.0001         | 0.017              | < 0.0001         | 0.09                  |

**Table S4.** Duration (months) (median (range)) of start of mating season in sheep and goat farms in Greece, in accord with the management system in the farms or the location of the farms in the country.

| Management system                            | Sheep      |           | Goats      |          |
|----------------------------------------------|------------|-----------|------------|----------|
|                                              | Adult ewes | Ewe-lambs | Adult does | Doelings |
| Intensive or semi-intensive                  | 2 (1-12)   | 1 (0-9)   | 1.5 (1-12) | 1 (0-5)  |
| Semi-extensive or extensive                  | 3 (1-12)   | 1 (0-7)   | 2 (1-12)   | 1 (0-6)  |
| <i>p</i>                                     | 0.54       | 0.44      | 0.34       | 0.38     |
| Area of the country, where farms are located | Sheep      |           | Goats      |          |
|                                              | Adult ewes | Ewe-lambs | Adult does | Doelings |
| Northern part                                | 2 (1-12)   | 1 (0-8)   | 1.5 (1-7)  | 1 (0-6)  |
| Central part                                 | 3 (1-12)   | 1 (0-9)   | 2 (1-12)   | 1 (0-5)  |
| Southern part                                | 1 (1-12)   | 1 (0-5)   | 1 (1-12)   | 1 (0-3)  |
| <i>p</i>                                     | 0.030      | 0.20      | 0.88       | 0.18     |

**Table S5.** Results of univariable analysis for associations with application of reproductive control in 325 sheep flocks in Greece.

| Reproductive control performed ( <i>n</i> = 108) |                        |                             | Reproductive control not performed ( <i>n</i> = 217) |                        |                             | <i>p</i> |
|--------------------------------------------------|------------------------|-----------------------------|------------------------------------------------------|------------------------|-----------------------------|----------|
| Location of the farm                             |                        |                             |                                                      |                        |                             |          |
| Northern part of Greece                          | Central part of Greece | Southern part of Greece     | Northern part of Greece                              | Central part of Greece | Southern part of Greece     | 0.91     |
| 49                                               | 47                     | 12                          | 104                                                  | 90                     | 23                          |          |
| Management system applied in the farm            |                        |                             |                                                      |                        |                             |          |
| Intensive or Semi-intensive                      |                        | Semi-extensive or Extensive | Intensive or Semi-intensive                          |                        | Semi-extensive or Extensive | 0.035    |
| 70                                               |                        | 38                          | 114                                                  |                        | 103                         |          |
| Availability of a separate lambing area          |                        |                             |                                                      |                        |                             |          |
| Yes                                              |                        | No                          | Yes                                                  |                        | No                          | 0.72     |
| 59                                               |                        | 49                          | 114                                                  |                        | 103                         |          |
| Total land available for grazing                 |                        |                             |                                                      |                        |                             |          |
| 1.47 ± 0.27 acres per animal                     |                        |                             | 2.50 ± 0.48 acres per animal                         |                        |                             | 0.14     |
| Availability of milking parlour                  |                        |                             |                                                      |                        |                             |          |
| Yes                                              |                        | No                          | Yes                                                  |                        | No                          | 0.0004   |
| 97                                               |                        | 11                          | 158                                                  |                        | 59                          |          |
| No. of ewes in the flock                         |                        |                             |                                                      |                        |                             |          |
| 285 ± 24                                         |                        |                             | 344 ± 16                                             |                        |                             | 0.038    |
| Breed of animals                                 |                        |                             |                                                      |                        |                             |          |
| Crossbreeds                                      | Imported breeds        | Local breeds                | Crossbreeds                                          | Imported breeds        | Local breeds                | 0.51     |
| 16                                               | 49                     | 43                          | 27                                                   | 89                     | 101                         |          |
| Collaboration with a veterinarian                |                        |                             |                                                      |                        |                             |          |
| Yes                                              |                        | No                          | Yes                                                  |                        | No                          | 0.08     |
| 99                                               |                        | 9                           | 184                                                  |                        | 33                          |          |

| Number of daily milking sessions                           |                                       |                    |                   |                                       |                    |
|------------------------------------------------------------|---------------------------------------|--------------------|-------------------|---------------------------------------|--------------------|
| One                                                        | Two                                   | Three              | One               | Two                                   | Three              |
| 0                                                          | 80                                    | 28                 | 1                 | 184                                   | 32                 |
| 0.041                                                      |                                       |                    |                   |                                       |                    |
| Age of the farmer                                          |                                       |                    |                   |                                       |                    |
| Up to 50 years                                             |                                       | Over 50 years      |                   | Up to 50 years                        |                    |
| 76                                                         |                                       | 32                 |                   | 121                                   |                    |
| 0.011                                                      |                                       |                    |                   |                                       |                    |
| Length of previous animal farming experience of the farmer |                                       |                    |                   |                                       |                    |
| ≤ 5 years                                                  |                                       | > 5 years          |                   | ≤ 5 years                             |                    |
| 34                                                         |                                       | 74                 |                   | 40                                    |                    |
| 0.008                                                      |                                       |                    |                   |                                       |                    |
| Education of the farmer                                    |                                       |                    |                   |                                       |                    |
| Primary education                                          | Secondary or post-secondary education | Tertiary education | Primary education | Secondary or post-secondary education | Tertiary education |
| 21                                                         | 71                                    | 16                 | 36                | 154                                   | 27                 |
| 0.63                                                       |                                       |                    |                   |                                       |                    |
| Professional involvement in farming                        |                                       |                    |                   |                                       |                    |
| Full-time                                                  |                                       | Part-time          |                   | Full-time                             |                    |
| 95                                                         |                                       | 13                 |                   | 197                                   |                    |
| 0.43                                                       |                                       |                    |                   |                                       |                    |
| Daily period at the farm                                   |                                       |                    |                   |                                       |                    |
| ≤ 8 hours                                                  |                                       | > 8 hours          |                   | ≤ 8 hours                             |                    |
| 44                                                         |                                       | 64                 |                   | 55                                    |                    |
| 0.005                                                      |                                       |                    |                   |                                       |                    |
| Family tradition in farming                                |                                       |                    |                   |                                       |                    |
| Yes                                                        |                                       | No                 |                   | Yes                                   |                    |
| 87                                                         |                                       | 21                 |                   | 196                                   |                    |
| 0.013                                                      |                                       |                    |                   |                                       |                    |
| Presence of working staff in the flock                     |                                       |                    |                   |                                       |                    |
| Yes                                                        |                                       | No                 |                   | Yes                                   |                    |
| 39                                                         |                                       | 69                 |                   | 85                                    |                    |
| 0.59                                                       |                                       |                    |                   |                                       |                    |

**Table S6.** Results of univariable analysis for associations with application of reproductive control in 119 goat herds in Greece.

| Reproductive control performed ( <i>n</i> = 20) |                        |                             | Reproductive control not performed ( <i>n</i> = 99) |                        |                             | <i>p</i> |
|-------------------------------------------------|------------------------|-----------------------------|-----------------------------------------------------|------------------------|-----------------------------|----------|
| Location of the farm                            |                        |                             |                                                     |                        |                             |          |
| Northern part of Greece                         | Central part of Greece | Southern part of Greece     | Northern part of Greece                             | Central part of Greece | Southern part of Greece     | 0.56     |
| 8                                               | 10                     | 2                           | 44                                                  | 38                     | 17                          |          |
| Management system applied in the farm           |                        |                             |                                                     |                        |                             |          |
| Intensive or Semi-intensive                     |                        | Semi-extensive or Extensive | Intensive or Semi-intensive                         |                        | Semi-extensive or Extensive | 0.17     |
| 9                                               |                        | 11                          | 29                                                  |                        | 70                          |          |
| Availability of a separate kidding area         |                        |                             |                                                     |                        |                             |          |
| Yes                                             |                        | No                          | Yes                                                 |                        | No                          | 0.71     |
| 9                                               |                        | 11                          | 49                                                  |                        | 50                          |          |
| Total land available for grazing                |                        |                             |                                                     |                        |                             |          |
| 6.43 ± 3.26 acres per animal                    |                        |                             | 6.69 ± 1.10 acres per animal                        |                        |                             | 0.93     |
| Availability of milking parlour                 |                        |                             |                                                     |                        |                             |          |
| Yes                                             |                        | No                          | Yes                                                 |                        | No                          | 0.015    |
| 16                                              |                        | 4                           | 50                                                  |                        | 49                          |          |
| No. of does in the herd                         |                        |                             |                                                     |                        |                             |          |
| 218 ± 49                                        |                        |                             | 249 ± 23                                            |                        |                             | 0.68     |
| Breed of animals                                |                        |                             |                                                     |                        |                             |          |
| Crossbreeds                                     | Imported breeds        | Local breeds                | Crossbreeds                                         | Imported breeds        | Local breeds                | 0.08     |
| 2                                               | 12                     | 6                           | 16                                                  | 33                     | 50                          |          |
| Collaboration with a veterinarian               |                        |                             |                                                     |                        |                             |          |
| Yes                                             |                        | No                          | Yes                                                 |                        | No                          | 0.48     |
| 18                                              |                        | 2                           | 83                                                  |                        | 16                          |          |



| Number of daily milking sessions                           |                                       |                    |                   |                                       |                    |
|------------------------------------------------------------|---------------------------------------|--------------------|-------------------|---------------------------------------|--------------------|
| One                                                        | Two                                   | Three              | One               | Two                                   | Three              |
| 0                                                          | 16                                    | 4                  | 4                 | 92                                    | 3                  |
| 0.010                                                      |                                       |                    |                   |                                       |                    |
| Age of the farmer                                          |                                       |                    |                   |                                       |                    |
| Up to 50 years                                             |                                       | Over 50 years      | Up to 50 years    |                                       | Over 50 years      |
| 18                                                         |                                       | 2                  | 55                |                                       | 4                  |
| 0.64                                                       |                                       |                    |                   |                                       |                    |
| Length of previous animal farming experience of the farmer |                                       |                    |                   |                                       |                    |
| ≤ 5 years                                                  |                                       | > 5 years          | ≤ 5 years         |                                       | > 5 years          |
| 6                                                          |                                       | 14                 | 18                |                                       | 81                 |
| 0.23                                                       |                                       |                    |                   |                                       |                    |
| Education of the farmer                                    |                                       |                    |                   |                                       |                    |
| Primary education                                          | Secondary or post-secondary education | Tertiary education | Primary education | Secondary or post-secondary education | Tertiary education |
| 1                                                          | 18                                    | 1                  | 19                | 71                                    | 9                  |
| 0.22                                                       |                                       |                    |                   |                                       |                    |
| Professional involvement in farming                        |                                       |                    |                   |                                       |                    |
| Full-time                                                  |                                       | Part-time          | Full-time         |                                       | Part-time          |
| 18                                                         |                                       | 2                  | 87                |                                       | 12                 |
| 0.79                                                       |                                       |                    |                   |                                       |                    |
| Daily period at the farm                                   |                                       |                    |                   |                                       |                    |
| ≤ 8 hours                                                  |                                       | > 8 hours          | ≤ 8 hours         |                                       | > 8 hours          |
| 7                                                          |                                       | 13                 | 20                |                                       | 79                 |
| 0.15                                                       |                                       |                    |                   |                                       |                    |
| Family tradition in farming                                |                                       |                    |                   |                                       |                    |
| Yes                                                        |                                       | No                 | Yes               |                                       | No                 |
| 16                                                         |                                       | 4                  | 87                |                                       | 12                 |
| 0.35                                                       |                                       |                    |                   |                                       |                    |
| Presence of working staff in the flock                     |                                       |                    |                   |                                       |                    |
| Yes                                                        |                                       | No                 | Yes               |                                       | No                 |
| 5                                                          |                                       | 15                 | 29                |                                       | 70                 |
| 0.70                                                       |                                       |                    |                   |                                       |                    |

**Table S7.** Results of univariable analysis for associations with pregnancy diagnosis by means of ultrasonographic examination in 325 sheep flocks in Greece.

| Pregnancy diagnosis performed ( <i>n</i> = 119)            |                                       |                             | Reproductive control not performed ( <i>n</i> = 206) |                                       |                    | <i>p</i>                    |          |
|------------------------------------------------------------|---------------------------------------|-----------------------------|------------------------------------------------------|---------------------------------------|--------------------|-----------------------------|----------|
| Management system applied in the farm                      |                                       |                             |                                                      |                                       |                    |                             |          |
| Intensive or Semi-intensive                                |                                       | Semi-extensive or Extensive |                                                      | Intensive or Semi-intensive           |                    | Semi-extensive or Extensive |          |
| 90                                                         |                                       | 29                          |                                                      | 94                                    |                    | 112                         | <0.0001  |
| Availability of milking parlour                            |                                       |                             |                                                      |                                       |                    |                             |          |
| Yes                                                        |                                       | No                          |                                                      | Yes                                   |                    | No                          |          |
| 112                                                        |                                       | 7                           |                                                      | 143                                   |                    | 63                          | <0.0001  |
| No. of ewes in the flock                                   |                                       |                             |                                                      |                                       |                    |                             |          |
| 362 ± 25                                                   |                                       |                             |                                                      | 303 ± 15                              |                    |                             | 0.031    |
| Collaboration with a veterinarian                          |                                       |                             |                                                      |                                       |                    |                             |          |
| Yes                                                        |                                       | No                          |                                                      | Yes                                   |                    | No                          |          |
| 111                                                        |                                       | 8                           |                                                      | 172                                   |                    | 34                          | 0.011    |
| Age of the farmer                                          |                                       |                             |                                                      |                                       |                    |                             |          |
| Up to 50 years                                             |                                       | Over 50 years               |                                                      | Up to 50 years                        |                    | Over 50 years               |          |
| 91                                                         |                                       | 28                          |                                                      | 106                                   |                    | 100                         | < 0.0001 |
| Length of previous animal farming experience of the farmer |                                       |                             |                                                      |                                       |                    |                             |          |
| ≤ 5 years                                                  |                                       | > 5 years                   |                                                      | ≤ 5 years                             |                    | > 5 years                   |          |
| 45                                                         |                                       | 74                          |                                                      | 29                                    |                    | 177                         | < 0.0001 |
| Education of the farmer                                    |                                       |                             |                                                      |                                       |                    |                             |          |
| Primary education                                          | Secondary or post-secondary education | Tertiary education          | Primary education                                    | Secondary or post-secondary education | Tertiary education |                             |          |
| 16                                                         | 87                                    | 16                          | 41                                                   | 138                                   | 27                 | 0.33                        |          |
| Professional involvement in farming                        |                                       |                             |                                                      |                                       |                    |                             |          |
| Full-time                                                  |                                       | Part-time                   |                                                      | Full-time                             |                    | Part-time                   |          |
| 104                                                        |                                       | 15                          |                                                      | 188                                   |                    | 18                          | 0.27     |

| Daily period at the farm               |           |           |           |         |
|----------------------------------------|-----------|-----------|-----------|---------|
| ≤ 8 hours                              | > 8 hours | ≤ 8 hours | > 8 hours |         |
| 45                                     | 74        | 54        | 152       | 0.028   |
| Family tradition in farming            |           |           |           |         |
| Yes                                    | No        | Yes       | No        |         |
| 90                                     | 29        | 193       | 13        | <0.0001 |
| Presence of working staff in the flock |           |           |           |         |
| Yes                                    | No        | Yes       | No        |         |
| 57                                     | 62        | 66        | 140       | 0.005   |

**Table S8.** Results of univariable analysis for associations with pregnancy diagnosis by means of ultrasonographic examination in 119 goat herds in Greece.

| Pregnancy diagnosis performed ( <i>n</i> = 20)             |                                       |                             | Reproductive control not performed ( <i>n</i> = 99) |                                       | <i>p</i>           |
|------------------------------------------------------------|---------------------------------------|-----------------------------|-----------------------------------------------------|---------------------------------------|--------------------|
| Management system applied in the farm                      |                                       |                             |                                                     |                                       |                    |
| Intensive or Semi-intensive                                |                                       | Semi-extensive or Extensive |                                                     |                                       |                    |
| 12                                                         |                                       | 8                           |                                                     | 26                                    |                    |
|                                                            |                                       |                             |                                                     | 73                                    |                    |
|                                                            |                                       |                             |                                                     | 0.003                                 |                    |
| Availability of milking parlour                            |                                       |                             |                                                     |                                       |                    |
| Yes                                                        |                                       | No                          |                                                     |                                       |                    |
| 18                                                         |                                       | 2                           |                                                     | 48                                    |                    |
|                                                            |                                       |                             |                                                     | 51                                    |                    |
|                                                            |                                       |                             |                                                     | 0.0007                                |                    |
| No. of does in the flock                                   |                                       |                             |                                                     |                                       |                    |
| 197 ± 48                                                   |                                       |                             |                                                     | 246 ± 23                              |                    |
|                                                            |                                       |                             |                                                     | 0.038                                 |                    |
| Collaboration with a veterinarian                          |                                       |                             |                                                     |                                       |                    |
| Yes                                                        |                                       | No                          |                                                     |                                       |                    |
| 19                                                         |                                       | 1                           |                                                     | 82                                    |                    |
|                                                            |                                       |                             |                                                     | 17                                    |                    |
|                                                            |                                       |                             |                                                     | 0.08                                  |                    |
| Age of the farmer                                          |                                       |                             |                                                     |                                       |                    |
| Up to 50 years                                             |                                       | Over 50 years               |                                                     |                                       |                    |
| 15                                                         |                                       | 5                           |                                                     | 58                                    |                    |
|                                                            |                                       |                             |                                                     | 41                                    |                    |
|                                                            |                                       |                             |                                                     | 0.17                                  |                    |
| Length of previous animal farming experience of the farmer |                                       |                             |                                                     |                                       |                    |
| ≤ 5 years                                                  |                                       | > 5 years                   |                                                     |                                       |                    |
| 7                                                          |                                       | 13                          |                                                     | 17                                    |                    |
|                                                            |                                       |                             |                                                     | 82                                    |                    |
|                                                            |                                       |                             |                                                     | 0.07                                  |                    |
| Education of the farmer                                    |                                       |                             |                                                     |                                       |                    |
| Primary education                                          | Secondary or post-secondary education | Tertiary education          | Primary education                                   | Secondary or post-secondary education | Tertiary education |
| 1                                                          | 17                                    | 2                           | 19                                                  | 72                                    | 8                  |
|                                                            |                                       |                             |                                                     | 0.30                                  |                    |
| Professional involvement in farming                        |                                       |                             |                                                     |                                       |                    |
| Full-time                                                  |                                       | Part-time                   |                                                     |                                       |                    |
| 19                                                         |                                       | 1                           |                                                     | 86                                    |                    |
|                                                            |                                       |                             |                                                     | 13                                    |                    |
|                                                            |                                       |                             |                                                     | 0.30                                  |                    |

| Daily period at the farm               |           |           |           |       |
|----------------------------------------|-----------|-----------|-----------|-------|
| ≤ 8 hours                              | > 8 hours | ≤ 8 hours | > 8 hours |       |
| 6                                      | 14        | 22        | 77        | 0.45  |
| Family tradition in farming            |           |           |           |       |
| Yes                                    | No        | Yes       | No        |       |
| 15                                     | 5         | 88        | 11        | 0.10  |
| Presence of working staff in the flock |           |           |           |       |
| Yes                                    | No        | Yes       | No        |       |
| 11                                     | 9         | 23        | 76        | 0.004 |

**Table S9.** Associations of the modification of the nutritional regime during pregnancy and the grouping of animals at the end of gestation according to the projected dates of parturition with application of reproductive control in 325 sheep flocks and 119 goat herds in Greece.

| Management system                                                                              | Sheep                               |                                        | Goats                               |                                        |
|------------------------------------------------------------------------------------------------|-------------------------------------|----------------------------------------|-------------------------------------|----------------------------------------|
|                                                                                                | Application of reproductive control | No application of reproductive control | Application of reproductive control | No application of reproductive control |
| Modification of the nutritional regime during pregnancy                                        | 88 / 108<br>(81.5%)                 | 141 / 217<br>(65.0%)                   | 12 / 20<br>(60.0%)                  | 56 / 99<br>(56.6%)                     |
| No modification of the nutritional regime during pregnancy                                     | 20 / 108<br>(18.5%)                 | 76 / 217<br>(35.0%)                    | 8 / 20<br>(40.0%)                   | 43 / 99<br>(43.4%)                     |
| <i>p</i>                                                                                       | 0.002                               |                                        | 0.78                                |                                        |
| Grouping of animals at the end of gestation according to the projected dates of parturition    | 90 / 108<br>(83.3%)                 | 124 / 217<br>(57.1%)                   | 16 / 20<br>(80.0%)                  | 53 / 99<br>(53.5%)                     |
| No grouping of animals at the end of gestation according to the projected dates of parturition | 18 / 108<br>(16.7%)                 | 93 / 217<br>(42.9%)                    | 4 / 20<br>(20.0%)                   | 46 / 99<br>(46.5%)                     |
| <i>p</i>                                                                                       | < 0.0001                            |                                        | 0.029                               |                                        |

**Table S10.** Associations of the modification of the nutritional regime during pregnancy and the grouping of animals at the end of gestation according to the projected dates of parturition with pregnancy diagnosis by means of ultrasonographic examination in 325 sheep flocks and 119 goat herds in Greece.

| Management system                                                                              | Sheep                                                        |                                                                 | Goats                                                        |                                                                 |
|------------------------------------------------------------------------------------------------|--------------------------------------------------------------|-----------------------------------------------------------------|--------------------------------------------------------------|-----------------------------------------------------------------|
|                                                                                                | Pregnancy diagnosis by means of ultrasonographic examination | No pregnancy diagnosis by means of ultrasonographic examination | Pregnancy diagnosis by means of ultrasonographic examination | No pregnancy diagnosis by means of ultrasonographic examination |
|                                                                                                |                                                              |                                                                 |                                                              |                                                                 |
| Modification of the nutritional regime during pregnancy                                        | 106 / 119<br>(89.1%)                                         | 123 / 206<br>(59.7%)                                            | 18 / 20<br>(90.0%)                                           | 50 / 99<br>(50.5%)                                              |
| No modification of the nutritional regime during pregnancy                                     | 13 / 119<br>(10.9%)                                          | 83 / 206<br>(40.3%)                                             | 2 / 20<br>(4.0%)                                             | 49 / 99<br>(49.5%)                                              |
| <i>p</i>                                                                                       | < 0.0001                                                     |                                                                 | 0.001                                                        |                                                                 |
| Grouping of animals at the end of gestation according to the projected dates of parturition    | 100 / 119<br>(84.0%)                                         | 114 / 206<br>(55.3%)                                            | 17 / 20<br>(85.0%)                                           | 52 / 99<br>(52.5%)                                              |
| No grouping of animals at the end of gestation according to the projected dates of parturition | 19 / 119<br>(16.0%)                                          | 92 / 206<br>(44.7%)                                             | 3 / 20<br>(15.0%)                                            | 47 / 99<br>(47.5%)                                              |
| <i>p</i>                                                                                       | < 0.0001                                                     |                                                                 | 0.007                                                        |                                                                 |

**Table S11.** Results of univariable analysis for associations with number of lambs born per ewe in 325 sheep flocks in Greece.

| Lambs born per ewe below national average (1.33) ( <i>n</i> = 189) |                        |                             | Lambs born per ewe above national average (1.33) ( <i>n</i> = 136) |                        |                             | <i>p</i> |
|--------------------------------------------------------------------|------------------------|-----------------------------|--------------------------------------------------------------------|------------------------|-----------------------------|----------|
| Location of the farm                                               |                        |                             |                                                                    |                        |                             |          |
| Northern part of Greece                                            | Central part of Greece | Southern part of Greece     | Northern part of Greece                                            | Central part of Greece | Southern part of Greece     | 0.0003   |
| 71                                                                 | 94                     | 24                          | 82                                                                 | 43                     | 11                          |          |
| Management system applied in the farm                              |                        |                             |                                                                    |                        |                             |          |
| Intensive or Semi-intensive                                        |                        | Semi-extensive or Extensive | Intensive or Semi-intensive                                        |                        | Semi-extensive or Extensive | 0.041    |
| 98                                                                 |                        | 91                          | 86                                                                 |                        | 50                          |          |
| Ewe : ram ratio in the farm                                        |                        |                             |                                                                    |                        |                             |          |
| 1:25.5 (1:17.3)                                                    |                        |                             | 1:24.1 (1:11.0)                                                    |                        |                             | 0.37     |
| Average age of culling ewes (years)                                |                        |                             |                                                                    |                        |                             |          |
| 5.9 ± 0.1                                                          |                        |                             | 5.8 ± 0.1                                                          |                        |                             | 0.78     |
| Breed of animals                                                   |                        |                             |                                                                    |                        |                             |          |
| Crossbreeds                                                        | Imported breeds        | Local breeds                | Crossbreeds                                                        | Imported breeds        | Local breeds                | 0.014    |
| 31                                                                 | 69                     | 89                          | 12                                                                 | 70                     | 54                          |          |
| Collaboration with a veterinarian                                  |                        |                             |                                                                    |                        |                             |          |
| Yes                                                                | No                     |                             | Yes                                                                | No                     |                             | 0.13     |
| 160                                                                | 29                     |                             | 123                                                                | 13                     |                             |          |
| Application of reproductive control                                |                        |                             |                                                                    |                        |                             |          |
| Yes                                                                | No                     |                             | Yes                                                                | No                     |                             | 0.17     |
| 57                                                                 | 132                    |                             | 51                                                                 | 85                     |                             |          |
| Start of mating season in adult animals                            |                        |                             |                                                                    |                        |                             |          |
| May (February – October)                                           |                        |                             | May (February – December)                                          |                        |                             | 0.37     |
| Duration of mating season in adult animals (months)                |                        |                             |                                                                    |                        |                             |          |
| 3.3 ± 0.2                                                          |                        |                             | 3.4 ± 0.3                                                          |                        |                             | 0.61     |



| Age of the farmer                                          |                                       |                    |                   |                                       |                    |
|------------------------------------------------------------|---------------------------------------|--------------------|-------------------|---------------------------------------|--------------------|
| Up to 50 years                                             |                                       | Over 50 years      |                   | Up to 50 years                        |                    |
| 109                                                        |                                       | 80                 |                   | 88                                    |                    |
|                                                            |                                       |                    |                   | 48                                    | > 0.20             |
| Length of previous animal farming experience of the farmer |                                       |                    |                   |                                       |                    |
| ≤ 5 years                                                  |                                       | > 5 years          |                   | ≤ 5 years                             |                    |
| 35                                                         |                                       | 154                |                   | 39                                    |                    |
|                                                            |                                       |                    |                   | 97                                    | 0.031              |
| Education of the farmer                                    |                                       |                    |                   |                                       |                    |
| Primary education                                          | Secondary or post-secondary education | Tertiary education | Primary education | Secondary or post-secondary education | Tertiary education |
| 34                                                         | 132                                   | 23                 | 23                | 92                                    | 20                 |
|                                                            |                                       |                    |                   |                                       | 0.78               |
| Professional involvement in farming                        |                                       |                    |                   |                                       |                    |
| Full-time                                                  |                                       | Part-time          |                   | Full-time                             |                    |
| 172                                                        |                                       | 17                 |                   | 120                                   |                    |
|                                                            |                                       |                    |                   | 16                                    | 0.41               |
| Daily period at the farm                                   |                                       |                    |                   |                                       |                    |
| ≤ 8 hours                                                  |                                       | > 8 hours          |                   | ≤ 8 hours                             |                    |
| 44                                                         |                                       | 145                |                   | 55                                    |                    |
|                                                            |                                       |                    |                   | 81                                    | 0.0009             |
| Family tradition in farming                                |                                       |                    |                   |                                       |                    |
| Yes                                                        |                                       | No                 |                   | Yes                                   |                    |
| 169                                                        |                                       | 20                 |                   | 114                                   |                    |
|                                                            |                                       |                    |                   | 22                                    | 0.14               |
| Presence of working staff in the flock                     |                                       |                    |                   |                                       |                    |
| Yes                                                        |                                       | No                 |                   | Yes                                   |                    |
| 64                                                         |                                       | 125                |                   | 59                                    |                    |
|                                                            |                                       |                    |                   | 77                                    | 0.08               |

**Table S12.** Results of univariable analysis for associations with number of kids born per female goat in 119 goat herds in Greece.

| Kids born per female goat below national average (1.30) ( <i>n</i> = 74) |                        |                             | Kids born per female goat above national average (1.30) ( <i>n</i> = 45) |                             |                         | <i>p</i> |
|--------------------------------------------------------------------------|------------------------|-----------------------------|--------------------------------------------------------------------------|-----------------------------|-------------------------|----------|
| Location of the farm                                                     |                        |                             |                                                                          |                             |                         |          |
| Northern part of Greece                                                  | Central part of Greece | Southern part of Greece     | Northern part of Greece                                                  | Central part of Greece      | Southern part of Greece | 0.12     |
| 27                                                                       | 34                     | 13                          | 25                                                                       | 14                          | 6                       |          |
| Management system applied in the farm                                    |                        |                             |                                                                          |                             |                         |          |
| Intensive or Semi-intensive                                              |                        | Semi-extensive or Extensive |                                                                          | Intensive or Semi-intensive |                         | 0.14     |
| 20                                                                       |                        | 54                          |                                                                          | 18                          |                         |          |
| Female goat : buck ratio in the farm                                     |                        |                             |                                                                          |                             |                         |          |
| 26.3 (1:13.9)                                                            |                        |                             | 18.8 (1:11)                                                              |                             |                         | 0.45     |
| Average age of culling female goats (years)                              |                        |                             |                                                                          |                             |                         |          |
| 7.1 ± 0.2                                                                |                        |                             | 6.7 ± 0.3                                                                |                             |                         | 0.32     |
| Breed of animals                                                         |                        |                             |                                                                          |                             |                         |          |
| Crossbreeds                                                              | Imported breeds        | Local breeds                | Crossbreeds                                                              | Imported breeds             | Local breeds            | 0.025    |
| 9                                                                        | 23                     | 42                          | 9                                                                        | 22                          | 14                      |          |
| Collaboration with a veterinarian                                        |                        |                             |                                                                          |                             |                         |          |
| Yes                                                                      |                        | No                          | Yes                                                                      |                             | No                      | 0.67     |
| 62                                                                       |                        | 12                          | 39                                                                       |                             | 6                       |          |
| Yes                                                                      |                        | No                          | Yes                                                                      |                             | No                      | 0.001    |
| 6                                                                        |                        | 68                          | 14                                                                       |                             | 31                      |          |
| Start of mating season in adult animals                                  |                        |                             |                                                                          |                             |                         |          |
| June (January – December)                                                |                        |                             | June (February – October)                                                |                             |                         | 0.86     |
| Duration of mating season in adult animals (months)                      |                        |                             |                                                                          |                             |                         |          |
| 2.6 ± 0.3                                                                |                        |                             | 3.1 ± 0.4                                                                |                             |                         | 0.40     |

| Age of the farmer                                          |                                       |                    |                   |                                       |                    |
|------------------------------------------------------------|---------------------------------------|--------------------|-------------------|---------------------------------------|--------------------|
| Up to 50 years                                             | Over 50 years                         | Up to 50 years     | Over 50 years     |                                       |                    |
| 42                                                         | 32                                    | 31                 | 14                |                                       | 0.19               |
| Length of previous animal farming experience of the farmer |                                       |                    |                   |                                       |                    |
| ≤ 5 years                                                  | > 5 years                             | ≤ 5 years          | > 5 years         |                                       |                    |
| 11                                                         | 63                                    | 13                 | 32                |                                       | 0.06               |
| Education of the farmer                                    |                                       |                    |                   |                                       |                    |
| Primary education                                          | Secondary or post-secondary education | Tertiary education | Primary education | Secondary or post-secondary education | Tertiary education |
| 12                                                         | 57                                    | 5                  | 8                 | 32                                    | 5                  |
|                                                            |                                       |                    |                   |                                       | 0.67               |
| Professional involvement in farming                        |                                       |                    |                   |                                       |                    |
| Full-time                                                  | Part-time                             | Full-time          | Part-time         |                                       |                    |
| 66                                                         | 8                                     | 39                 | 6                 |                                       | 0.68               |
| Daily period at the farm                                   |                                       |                    |                   |                                       |                    |
| ≤ 8 hours                                                  | > 8 hours                             | ≤ 8 hours          | > 8 hours         |                                       |                    |
| 15                                                         | 59                                    | 13                 | 32                |                                       | 0.28               |
| Family tradition in farming                                |                                       |                    |                   |                                       |                    |
| Yes                                                        | No                                    | Yes                | No                |                                       |                    |
| 65                                                         | 9                                     | 38                 | 7                 |                                       | 0.60               |
| Presence of working staff in the herd                      |                                       |                    |                   |                                       |                    |
| Yes                                                        | No                                    | Yes                | No                |                                       |                    |
| 18                                                         | 56                                    | 16                 | 29                |                                       | 0.19               |

**Table S13.** Number of lambs / kids born per ewe / female goat in accord with breeds of animals in sheep and goat farms in Greece.

| Sheep breed <sup>1</sup> | Mean number of lambs<br>born per ewe found in the study        | Average number of lambs born per<br>ewe in Greece, as reported in the literature<br>[Zygyiannis 2014 <sup>2</sup> ]                       |
|--------------------------|----------------------------------------------------------------|-------------------------------------------------------------------------------------------------------------------------------------------|
| Assaf                    | 1.32 ± 0.03                                                    | not available                                                                                                                             |
| Chios                    | 1.39 ± 0.03                                                    | 1.75                                                                                                                                      |
| Crossbreeds              | 1.26 ± 0.02                                                    | not available                                                                                                                             |
| Friesarta                | 1.41 ± 0.07                                                    | 1.50                                                                                                                                      |
| Friesian                 | 1.37 ± 0.05                                                    | 1.80-2.00                                                                                                                                 |
| Karagouniko              | 1.46 ± 0.09                                                    | 1.20-1.40                                                                                                                                 |
| Lacaune                  | 1.39 ± 0.02                                                    | 1.63                                                                                                                                      |
| Local breeds             | 1.25 ± 0.02                                                    | 1.05-1.40                                                                                                                                 |
| Mytilini                 | 1.20 ± 0.01                                                    | 1.10                                                                                                                                      |
| Sfakia                   | 1.02 ± 0.07                                                    | 1.10                                                                                                                                      |
| <i>p</i>                 | < 0.0001                                                       |                                                                                                                                           |
| Goat breed <sup>1</sup>  | Mean number of kids<br>born per female goat found in the study | Average number of kids born per<br>female goat in Greece, as reported in the<br>literature [Zygyiannis and Katsaounis 2009 <sup>3</sup> ] |
| Alpine                   | 1.38 ± 0.12                                                    | 1.80-2.00                                                                                                                                 |
| Crossbreeds              | 1.34 ± 0.05                                                    | not available                                                                                                                             |
| Damascus                 | 1.31 ± 0.05                                                    | 1.70-1.80                                                                                                                                 |
| Local                    | 1.25 ± 0.02                                                    | 1.10-1.20                                                                                                                                 |
| Murcia                   | 1.34 ± 0.05                                                    | not available                                                                                                                             |
| Saanen                   | 1.35 ± 0.10                                                    | 1.80-2.00                                                                                                                                 |
| Skopelos                 | 1.18 ± 0.04                                                    | 1.34                                                                                                                                      |
| <i>p</i>                 | 0.40                                                           |                                                                                                                                           |

<sup>1</sup> Only breeds seen in at least five farms are included.

<sup>2</sup> Zygyiannis, D.G. *Sheep Production*. Synchroni Paideia, Thessaloniki, 2014.

<sup>3</sup> Zygyiannis, D.G.; Katsaounis, N.K. *Goat Production*. Synchroni Paideia, Thessaloniki, 2009

**Table S14.** Age of lambs / kids taken away from dam in accord with management system in sheep and goat farms in Greece.

| Management system           | Sheep flocks | Goat herds  | <i>p</i> |
|-----------------------------|--------------|-------------|----------|
| Intensive or semi-intensive | 44 ± 1 days  | 58 ± 5 days | 0.005    |
| Extensive or semi-extensive | 58 ± 2 days  | 68 ± 4 days | 0.0001   |
| <i>p</i>                    | < 0.0001     | 0.11        |          |

**Table S15.** Age of replacement of adult animals in accord with management system in sheep and goat farms in Greece.

| <b>Sheep flocks</b>         |                     |                 |                 |
|-----------------------------|---------------------|-----------------|-----------------|
| <b>Management system</b>    | <b>Ewes</b>         | <b>Rams</b>     | <b><i>p</i></b> |
| Intensive or semi-intensive | 5.7 ± 0.1 years     | 4.0 ± 0.1 years | < 0.0001        |
| Extensive or semi-extensive | 6.1 ± 0.1 years     | 4.7 ± 0.2 years | < 0.0001        |
| <b><i>p</i></b>             | 0.005               | 0.002           |                 |
| <b>Goat herds</b>           |                     |                 |                 |
| <b>Management system</b>    | <b>Female goats</b> | <b>Bucks</b>    | <b><i>p</i></b> |
| Intensive or semi-intensive | 6.3 ± 0.1 years     | 4.0 ± 0.1 years | < 0.0001        |
| Extensive or semi-extensive | 7.2 ± 0.2 years     | 5.2 ± 0.2 days  | < 0.0001        |
| <b><i>p</i></b>             | 0.008               | 0.002           |                 |

**Table S16.** Associations between the start of the mating period and production parameters assessed in sheep and goat farms in Greece.

| Sheep flocks                                                           |                                                                                 |                                                                                 |          |
|------------------------------------------------------------------------|---------------------------------------------------------------------------------|---------------------------------------------------------------------------------|----------|
| Parameters                                                             | Start of mating period<br>up to April                                           | Start of mating period<br>from May                                              | <i>p</i> |
| Annual milk production<br>per ewe (L)                                  | 223 ± 9                                                                         | 201 ± 6                                                                         | 0.06     |
| Average number of lambs<br>born per ewe                                | 1.36 ± 0.02                                                                     | 1.31 ± 0.01                                                                     | 0.08     |
| Somatic cell counts in bulk-tank<br>milk (cells mL <sup>-1</sup> )     | 0.508 × 10 <sup>6</sup><br>(0.433 × 10 <sup>6</sup> – 0.596 × 10 <sup>6</sup> ) | 0.467 × 10 <sup>6</sup><br>(0.424 × 10 <sup>6</sup> – 0.515 × 10 <sup>6</sup> ) | 0.40     |
| Total bacterial counts in bulk-tank<br>milk (c.f.u. mL <sup>-1</sup> ) | 423 × 10 <sup>3</sup><br>(302 × 10 <sup>3</sup> – 603 × 10 <sup>3</sup> )       | 402 × 10 <sup>3</sup><br>(316 × 10 <sup>3</sup> – 501 × 10 <sup>3</sup> )       | 0.46     |
| Fat content<br>in bulk-tank milk (%)                                   | 6.32 ± 0.08                                                                     | 6.15 ± 0.06                                                                     | 0.81     |
| Protein content<br>in bulk-tank milk (%)                               | 4.43 ± 0.03                                                                     | 4.42 ± 0.02                                                                     | 0.68     |
| Goat herds                                                             |                                                                                 |                                                                                 |          |
| Parameters                                                             | Start of mating period<br>up to May                                             | Start of mating period<br>from June                                             | <i>p</i> |
| Annual milk production<br>per ewe (L)                                  | 189 ± 16                                                                        | 210 ± 16                                                                        | 0.36     |
| Average number of kids<br>born per female goat                         | 1.30 ± 0.03                                                                     | 1.30 ± 0.03                                                                     | 0.99     |
| Somatic cell counts in bulk-tank<br>milk (cells mL <sup>-1</sup> )     | 0.872 × 10 <sup>6</sup><br>(0.733 × 10 <sup>6</sup> – 1.037 × 10 <sup>6</sup> ) | 0.814 × 10 <sup>6</sup><br>(0.713 × 10 <sup>6</sup> – 0.928 × 10 <sup>6</sup> ) | 0.53     |
| Total bacterial counts in bulk-tank<br>milk (c.f.u. mL <sup>-1</sup> ) | 672 × 10 <sup>3</sup><br>(447 × 10 <sup>3</sup> – 1023 × 10 <sup>3</sup> )      | 531 × 10 <sup>3</sup><br>(372 × 10 <sup>3</sup> – 776 × 10 <sup>3</sup> )       | 0.41     |
| Fat content<br>in bulk-tank milk (%)                                   | 4.96 ± 0.20                                                                     | 4.67 ± 0.14                                                                     | 0.21     |
| Protein content<br>in bulk-tank milk (%)                               | 3.32 ± 0.11                                                                     | 3.25 ± 0.04                                                                     | 0.51     |

**Table S17.** Associations between the application of reproductive control and production parameters assessed in sheep and goat farms in Greece.

| Sheep flocks                                                        |                                                                                 |                                                                                 |          |
|---------------------------------------------------------------------|---------------------------------------------------------------------------------|---------------------------------------------------------------------------------|----------|
| Parameters                                                          | No application of reproductive control                                          | Application of reproductive control                                             | <i>p</i> |
| Annual milk production per ewe (L)                                  | 197 ± 6                                                                         | 229 ± 8                                                                         | 0.002    |
| Average number of lambs born per ewe                                | 1.30 ± 0.01                                                                     | 1.37 ± 0.02                                                                     | 0.002    |
| Somatic cell counts in bulk-tank milk (cells mL <sup>-1</sup> )     | 0.504 × 10 <sup>6</sup><br>(0.458 × 10 <sup>6</sup> – 0.556 × 10 <sup>6</sup> ) | 0.448 × 10 <sup>6</sup><br>(0.393 × 10 <sup>6</sup> – 0.511 × 10 <sup>6</sup> ) | 0.19     |
| Total bacterial counts in bulk-tank milk (c.f.u. mL <sup>-1</sup> ) | 432 × 10 <sup>3</sup><br>(347 × 10 <sup>3</sup> – 550 × 10 <sup>3</sup> )       | 337 × 10 <sup>3</sup><br>(251 × 10 <sup>3</sup> – 457 × 10 <sup>3</sup> )       | 0.20     |
| Fat content in bulk-tank milk (%)                                   | 6.20 ± 0.06                                                                     | 6.10 ± 0.08                                                                     | 0.32     |
| Protein content in bulk-tank milk (%)                               | 4.45 ± 0.03                                                                     | 4.41 ± 0.02                                                                     | 0.16     |
| Goat herds                                                          |                                                                                 |                                                                                 |          |
| Parameters                                                          | No application of reproductive control                                          | No application of reproductive control                                          | <i>p</i> |
| Annual milk production per ewe (L)                                  | 194 ± 12                                                                        | 235 ± 24                                                                        | 0.07     |
| Average number of kids born per female goat                         | 1.26 ± 0.02                                                                     | 1.45 ± 0.06                                                                     | 0.0002   |
| Somatic cell counts in bulk-tank milk (cells mL <sup>-1</sup> )     | 0.842 × 10 <sup>6</sup><br>(0.759 × 10 <sup>6</sup> – 0.935 × 10 <sup>6</sup> ) | 0.808 × 10 <sup>6</sup><br>(0.596 × 10 <sup>6</sup> – 1.096 × 10 <sup>6</sup> ) | 0.75     |
| Total bacterial counts in bulk-tank milk (c.f.u. mL <sup>-1</sup> ) | 573 × 10 <sup>3</sup><br>(427 × 10 <sup>3</sup> – 776 × 10 <sup>3</sup> )       | 727 × 10 <sup>3</sup><br>(417 × 10 <sup>3</sup> – 1259 × 10 <sup>3</sup> )      | 0.51     |
| Fat content in bulk-tank milk (%)                                   | 4.80 ± 0.12                                                                     | 4.63 ± 0.25                                                                     | 0.57     |
| Protein content in bulk-tank milk (%)                               | 3.29 ± 0.06                                                                     | 3.20 ± 0.09                                                                     | 0.50     |



**Table S18.** Associations between pregnancy diagnosis by means of ultrasonographic examination and production parameters assessed in sheep and goat farms in Greece.

| Sheep flocks                                                        |                                                                                 |                                                                                 |          |
|---------------------------------------------------------------------|---------------------------------------------------------------------------------|---------------------------------------------------------------------------------|----------|
| Parameters                                                          | No application of reproductive control                                          | Application of reproductive control                                             | <i>p</i> |
| Annual milk production per ewe (L)                                  | 186 ± 6                                                                         | 244 ± 8                                                                         | < 0.0001 |
| Average number of lambs born per ewe                                | 1.29 ± 0.01                                                                     | 1.39 ± 0.01                                                                     | < 0.0001 |
| Somatic cell counts in bulk-tank milk (cells mL <sup>-1</sup> )     | 0.501 × 10 <sup>6</sup><br>(0.451 × 10 <sup>6</sup> – 0.556 × 10 <sup>6</sup> ) | 0.458 × 10 <sup>6</sup><br>(0.407 × 10 <sup>6</sup> – 0.515 × 10 <sup>6</sup> ) | 0.19     |
| Total bacterial counts in bulk-tank milk (c.f.u. mL <sup>-1</sup> ) | 437 × 10 <sup>3</sup><br>(347 × 10 <sup>3</sup> – 550 × 10 <sup>3</sup> )       | 331 × 10 <sup>3</sup><br>(251 × 10 <sup>3</sup> – 437 × 10 <sup>3</sup> )       | 0.20     |
| Fat content in bulk-tank milk (%)                                   | 6.14 ± 0.06                                                                     | 6.21 ± 0.07                                                                     | 0.46     |
| Protein content in bulk-tank milk (%)                               | 4.39 ± 0.02                                                                     | 4.48 ± 0.02                                                                     | 0.004    |
| Goat herds                                                          |                                                                                 |                                                                                 |          |
| Parameters                                                          | No application of reproductive control                                          | No application of reproductive control                                          | <i>p</i> |
| Annual milk production per ewe (L)                                  | 190 ± 12                                                                        | 255 ± 26                                                                        | 0.024    |
| Average number of kids born per female goat                         | 1.28 ± 0.02                                                                     | 1.39 ± 0.05                                                                     | 0.027    |
| Somatic cell counts in bulk-tank milk (cells mL <sup>-1</sup> )     | 0.854 × 10 <sup>6</sup><br>(0.764 × 10 <sup>6</sup> – 0.954 × 10 <sup>6</sup> ) | 0.795 × 10 <sup>6</sup><br>(0.587 × 10 <sup>6</sup> – 1.023 × 10 <sup>6</sup> ) | 0.75     |
| Total bacterial counts in bulk-tank milk (c.f.u. mL <sup>-1</sup> ) | 589 × 10 <sup>3</sup><br>(447 × 10 <sup>3</sup> – 813 × 10 <sup>3</sup> )       | 589 × 10 <sup>3</sup><br>(316 × 10 <sup>3</sup> – 1096 × 10 <sup>3</sup> )      | 0.51     |
| Fat content in bulk-tank milk (%)                                   | 4.81 ± 0.12                                                                     | 4.59 ± 0.29                                                                     | 0.47     |
| Protein content in bulk-tank milk (%)                               | 3.28 ± 0.06                                                                     | 3.24 ± 0.05                                                                     | 0.80     |

**Table S19.** Correlations between the age that newborns were taken away from their dams and production parametres assessed in sheep and goat farms in Greece.

| Sheep flocks                                                        |                                                              |          |
|---------------------------------------------------------------------|--------------------------------------------------------------|----------|
| Parametres                                                          | Correlation coefficient between age and respective parametre | <i>p</i> |
| Annual milk production per ewe (L)                                  | −0.350                                                       | < 0.0001 |
| Somatic cell counts in bulk-tank milk (cells mL <sup>−1</sup> )     | 0.106                                                        | 0.028    |
| Total bacterial counts in bulk-tank milk (c.f.u. mL <sup>−1</sup> ) | 0.062                                                        | 0.13     |
| Fat content in bulk-tank milk (%)                                   | 0.094                                                        | 0.045    |
| Protein content in bulk-tank milk (%)                               | −0.049                                                       | 0.19     |
| Goat herds                                                          |                                                              |          |
| Parametres                                                          | Correlation coefficient between age and respective parametre | <i>p</i> |
| Annual milk production per ewe (L)                                  | −0.164                                                       | 0.038    |
| Somatic cell counts in bulk-tank milk (cells mL <sup>−1</sup> )     | 0.124                                                        | 0.09     |
| Total bacterial counts in bulk-tank milk (c.f.u. mL <sup>−1</sup> ) | 0.012                                                        | 0.45     |
| Fat content in bulk-tank milk (%)                                   | 0.286                                                        | 0.0008   |
| Protein content in bulk-tank milk (%)                               | −0.024                                                       | 0.40     |

**Table S20.** Correlations between the age that adult animals were removed from the farm and production parametres assessed in sheep and goat farms in Greece.

| Sheep flocks                                                        |                                                              |          |
|---------------------------------------------------------------------|--------------------------------------------------------------|----------|
| Parametres                                                          | Correlation coefficient between age and respective parametre | <i>p</i> |
| Annual milk production per ewe (L)                                  | −0.255                                                       | < 0.0001 |
| Average number of lambs born per ewe                                | −0.062                                                       | 0.13     |
| Somatic cell counts in bulk-tank milk (cells mL <sup>−1</sup> )     | 0.076                                                        | 0.09     |
| Total bacterial counts in bulk-tank milk (c.f.u. mL <sup>−1</sup> ) | 0.048                                                        | 0.19     |
| Fat content in bulk-tank milk (%)                                   | 0.027                                                        | 0.31     |
| Protein content in bulk-tank milk (%)                               | −0.009                                                       | 0.44     |
| Goat herds                                                          |                                                              |          |
| Parametres                                                          | Correlation coefficient between age and respective parametre | <i>p</i> |
| Annual milk production per ewe (L)                                  | −0.234                                                       | 0.006    |
| Average number of kids born per female goat                         | −0.169                                                       | 0.034    |
| Somatic cell counts in bulk-tank milk (cells mL <sup>−1</sup> )     | −0.039                                                       | 0.34     |
| Total bacterial counts in bulk-tank milk (c.f.u. mL <sup>−1</sup> ) | −0.121                                                       | 0.10     |
| Fat content in bulk-tank milk (%)                                   | 0.060                                                        | 0.26     |
| Protein content in bulk-tank milk (%)                               | −0.035                                                       | 0.35     |

**Table S21.** Associations between criteria evaluated by farmers for sourcing replacement animals from their own farms and production parametres assessed in sheep and goat farms in Greece.

| <b>Sheep flocks</b>                                             |                                                                                 |                                                                                 |                                                                                 |                 |
|-----------------------------------------------------------------|---------------------------------------------------------------------------------|---------------------------------------------------------------------------------|---------------------------------------------------------------------------------|-----------------|
| <b>Parametres</b>                                               | Dam milk production                                                             | General animal morphology                                                       | Milkability                                                                     | <b><i>p</i></b> |
| Annual milk production per ewe (L)                              | 206 ± 6                                                                         | 207 ± 11                                                                        | 220 ± 12                                                                        | 0.54            |
| Somatic cell counts in bulk-tank milk (cells mL <sup>-1</sup> ) | 0.476 × 10 <sup>6</sup><br>(0.451 × 10 <sup>6</sup> – 0.522 × 10 <sup>6</sup> ) | 0.463 × 10 <sup>6</sup><br>(0.382 × 10 <sup>6</sup> – 0.563 × 10 <sup>6</sup> ) | 0.926 × 10 <sup>6</sup><br>(0.461 × 10 <sup>6</sup> – 0.652 × 10 <sup>6</sup> ) | 0.33            |
| <b>Goat herds</b>                                               |                                                                                 |                                                                                 |                                                                                 |                 |
| <b>Parametres</b>                                               | Dam milk production                                                             | General animal morphology                                                       | Milkability                                                                     | <b><i>p</i></b> |
| Annual milk production per ewe (L)                              | 187 ± 12                                                                        | 211 ± 25                                                                        | 266 ± 34                                                                        | 0.030           |
| Somatic cell counts in bulk-tank milk (cells mL <sup>-1</sup> ) | 0.812 × 10 <sup>6</sup><br>(0.728 × 10 <sup>6</sup> – 0.909 × 10 <sup>6</sup> ) | 0.463 × 10 <sup>6</sup><br>(0.675 × 10 <sup>6</sup> – 0.974 × 10 <sup>6</sup> ) | 0.549 × 10 <sup>6</sup><br>(0.708 × 10 <sup>6</sup> – 1.208 × 10 <sup>6</sup> ) | 0.47            |
